# Supplementary material
Source: PubMed Central journal article supplement (PMC2852948)
Supplement: supp_M109.063305_1.pdf [file supp_M109.063305_1.pdf]

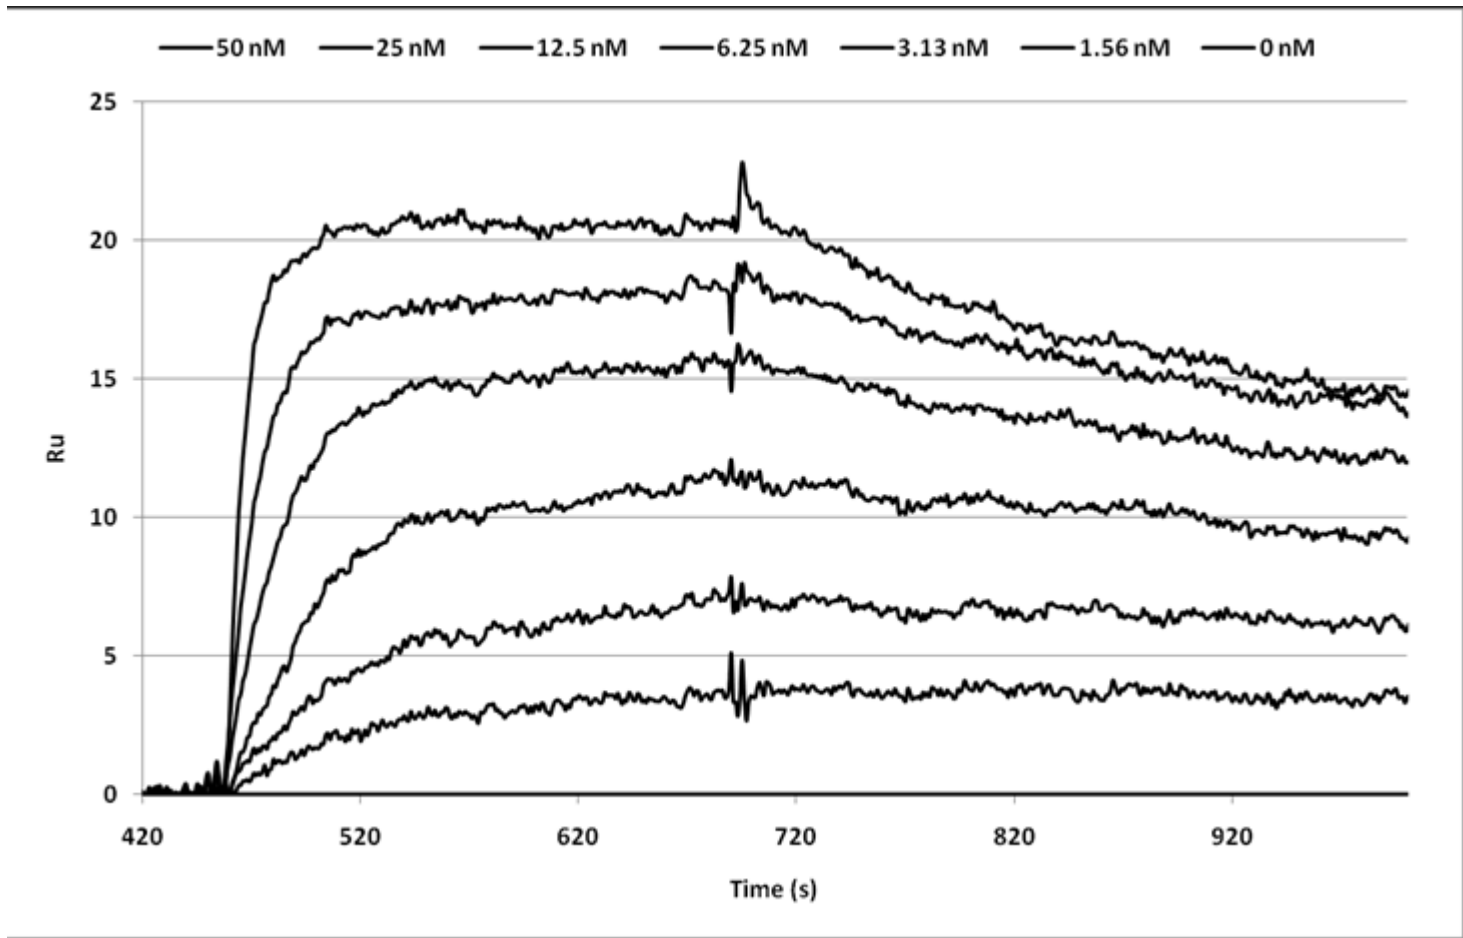

**Supplementary figure 1:** Biacore analysis of clone TN2-B1-C31 binding to hTNF $\alpha$ . 50 Ru of hTNF $\alpha$  was immobilized and the indicated amount of TN2-B1-C31 was used.
